# Supplementary material
Source: PubMed Central journal article supplement (PMC3064235)
Supplement: supp_M111.219626_Supporting_online__information_-redactory.pdf [file supp_M111.219626_Supporting_online__information_-redactory.pdf]

## On-line Supporting Information

# A twin-track approach has optimised proton and hydride transfer by dynamically-coupled tunnelling during the evolution of protochlorophyllide oxidoreductase.

Derren J. Heyes, Colin Levy, Michiyo Sakuma, David L. Robertson & Nigel S. Scrutton

### Supplementary tables

**Table S1.** The rate constants and thermodynamic parameters for the hydride transfer step for the various POR enzymes in the presence of either *pro-S* NADPH or *S*-NADP<sup>2</sup>H (*S*-NADPD). All rate constants were measured at 25°C as described in the *Methods*. The enthalpies of activation,  $\Delta H^\ddagger$ , and the entropies of activation,  $\Delta S^\ddagger$ , have been calculated by fitting the temperature dependence data to the Eyring equation.

|                                                            | <i>Thermosyn. elongatus</i> | <i>Synechocystis sp. PCC6803</i> | <i>Gloeobacter violaceus</i> | <i>Arabidopsis</i> POR B |
|------------------------------------------------------------|-----------------------------|----------------------------------|------------------------------|--------------------------|
| $k_H$ (s <sup>-1</sup> x10 <sup>6</sup> )                  | 1.87 ± 0.17                 | 1.86 ± 0.18                      | 1.86 ± 0.12                  | 1.81 ± 0.24              |
| $k_D$ (s <sup>-1</sup> x10 <sup>6</sup> )                  | 0.98 ± 0.14                 | 0.98 ± 0.13                      | 0.95 ± 0.18                  | 0.96 ± 0.11              |
| <b>KIE</b>                                                 | 1.91 ± 0.17                 | 1.90 ± 0.16                      | 1.94 ± 0.13                  | 1.91 ± 0.23              |
| $\Delta H^\ddagger$ (kJ mol <sup>-1</sup> )                | 9.3 ± 0.4                   | 11.7 ± 0.2                       | 13.3 ± 0.5                   | 13.6 ± 0.7               |
| (< -27°C)                                                  | (27.2 ± 0.5)                | (35.0 ± 1.0)                     | (33.1 ± 1.0)                 | (33.7 ± 1.0)             |
| $\Delta\Delta H^\ddagger$ (kJ mol <sup>-1</sup> )          | 8.2 ± 0.6                   | 7.0 ± 0.3                        | 6.9 ± 0.7                    | 7.6 ± 0.9                |
| (< -27°C)                                                  | (0.4 ± 1.0)                 | (0.4 ± 1.5)                      | (0.5 ± 1.2)                  | (0.3 ± 1.2)              |
| $\Delta S^\ddagger$ (J mol <sup>-1</sup> K <sup>-1</sup> ) | -94.4 ± 1.2                 | -85.9 ± 0.5                      | -78.6 ± 1.1                  | -79.4 ± 1.7              |
| (< -27°C)                                                  | (-21.8 ± 0.3)               | (10.0 ± 0.2)                     | (0.3 ± 0.1)                  | (2.8 ± 0.1)              |
| <b>ln A'</b>                                               | 12.4 ± 0.2                  | 13.4 ± 0.1                       | 14.3 ± 0.2                   | 14.2 ± 0.3               |
| (< -27°C)                                                  | (21.1 ± 0.3)                | (25.0 ± 0.5)                     | (23.8 ± 0.5)                 | (24.1 ± 0.5)             |
| $A'_H/A'_D$                                                | 0.08 ± 0.02                 | 0.11 ± 0.01                      | 0.15 ± 0.05                  | 0.08 ± 0.04              |
| (< -27°C)                                                  | (3.6 ± 2.0)                 | (3.4 ± 2.7)                      | (3.1 ± 1.9)                  | (3.5 ± 2.3)              |

**Table S2.** The rate constants and thermodynamic parameters for the proton transfer step for the various POR enzymes in either H<sub>2</sub>O or <sup>2</sup>H<sub>2</sub>O (D<sub>2</sub>O) buffers. All rate constants were measured at 25°C as described in the *Methods*. The enthalpies of activation,  $\Delta H^\ddagger$ , and the entropies of activation,  $\Delta S^\ddagger$ , have been calculated by fitting the temperature dependence data to the Eyring equation.

|                                                            | <i>Thermosyn.<br/>elongatus</i> | <i>Synechocystis<br/>sp. PCC6803</i> | <i>Gloeobacter<br/>violaceus</i> | <i>Arabidopsis<br/>POR B</i> |
|------------------------------------------------------------|---------------------------------|--------------------------------------|----------------------------------|------------------------------|
| $k_{H^+}$ (s <sup>-1</sup> x10 <sup>3</sup> )              | 27.4 ± 1.0                      | 30.4 ± 0.6                           | 152.0 ± 5.7                      | 123.3 ± 3.7                  |
| $k_{D^+}$ (s <sup>-1</sup> x10 <sup>3</sup> )              | 13.6 ± 0.8                      | 16.9 ± 0.7                           | 98.9 ± 2.7                       | 82.0 ± 1.9                   |
| <b>SIE</b>                                                 | 2.01 ± 0.14                     | 1.80 ± 0.08                          | 1.54 ± 0.07                      | 1.50 ± 0.07                  |
| $\Delta H^\ddagger$ (kJ mol <sup>-1</sup> )                | 53.7 ± 1.6                      | 52.1 ± 2.1                           | 43.9 ± 0.8                       | 36.7 ± 1.3                   |
| $\Delta\Delta H^\ddagger$ (kJ mol <sup>-1</sup> )          | 15.6 ± 3.1                      | 17.6 ± 3.7                           | 2.6 ± 2.4                        | 1.0 ± 1.9                    |
| $\Delta S^\ddagger$ (J mol <sup>-1</sup> K <sup>-1</sup> ) | 19.4 ± 0.5                      | 14.4 ± 0.5                           | 1.7 ± 0.1                        | -24.3 ± 0.6                  |
| <b>ln A'</b>                                               | 26.1 ± 0.6                      | 25.5 ± 0.8                           | 24.0 ± 0.3                       | 20.8 ± 0.5                   |
| <b>A'<sub>H</sub>/A'<sub>D</sub></b>                       | 0.004 ± 0.005                   | 0.002 ± 0.003                        | 0.55 ± 0.57                      | 0.90 ± 0.70                  |

**Table S3.** Rate constants of the product release steps for the various POR enzymes. All values were measured at 25°C as described in the *Methods*. n/a means not applicable as no rate constant is measurable. Standard errors are within 5% of the measured values for the rate constants. These are approximate rate constants for each kinetic phase fitted by using a single exponential expression to each resolved phase as previously described (2), rather than fitting to a more complex sequential model. Data for *T. elongatus* is taken from (2).

| <b>Product release event</b>    | <i>Thermosyn. elongatus</i> | <i>Synechocystis sp. PCC6803</i> | <i>Gloeobacter violaceus</i> | <i>Arabidopsis</i> POR B |
|---------------------------------|-----------------------------|----------------------------------|------------------------------|--------------------------|
| <b>Conformational change</b>    | 350 s <sup>-1</sup>         | 350 s <sup>-1</sup>              | n/a                          | n/a                      |
| <b>NADP<sup>+</sup> release</b> | 45 s <sup>-1</sup>          | 45 s <sup>-1</sup>               | 10 s <sup>-1</sup>           | 65 s <sup>-1</sup>       |
| <b>NADPH rebinding</b>          | 16 s <sup>-1</sup>          | n/a                              | 1 s <sup>-1</sup>            | 11 s <sup>-1</sup>       |
| <b>Chlide release</b>           | 1.7 s <sup>-1</sup>         | 0.2 s <sup>-1</sup>              | 0.04 s <sup>-1</sup>         | 1.4 s <sup>-1</sup>      |

**Supplementary Figures**

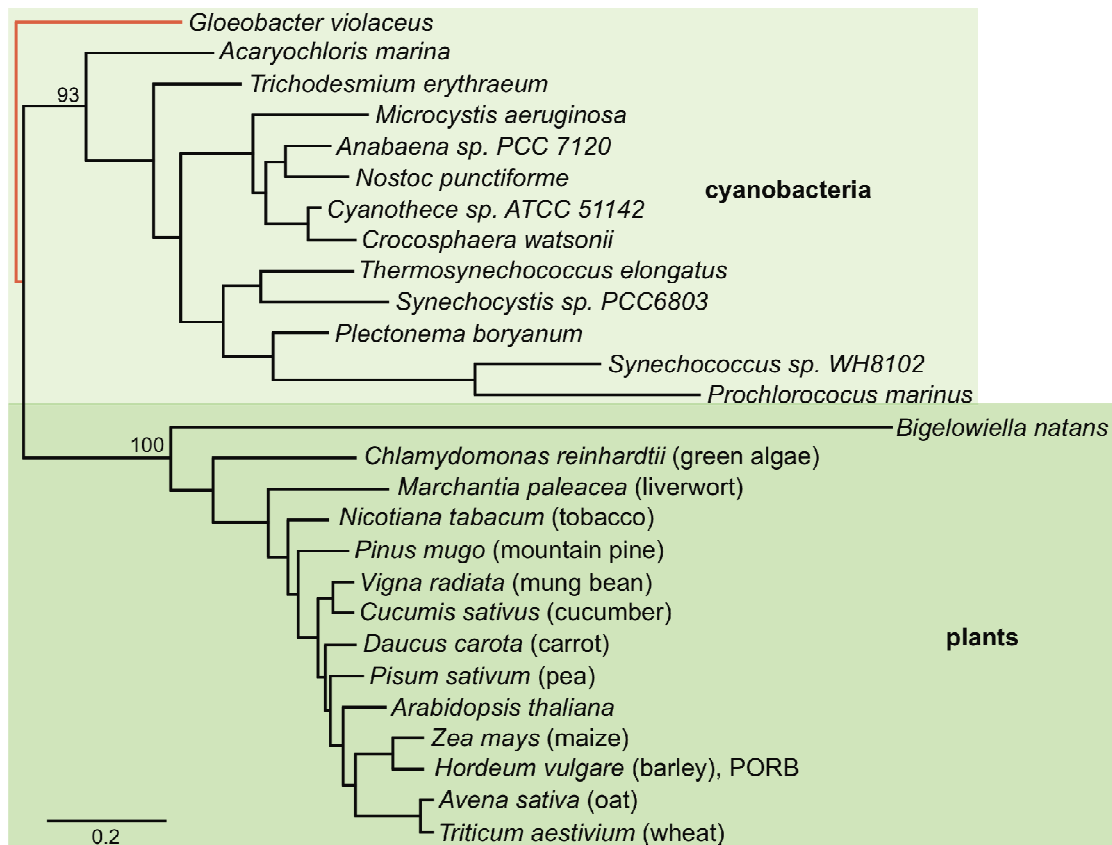

**Figure S1.** Inferred evolutionary history of plant and cyanobacteria PORs based on the alignment in panel B. The scale bar represents amino acid replacements per site. Numbers next to nodes correspond to % bootstrap replicates; only shown for the main cyanobacteria and plant clades.

|                             |                                                                            |
|-----------------------------|----------------------------------------------------------------------------|
| <i>Nicotiana</i>            | -----ATTPAVNQSTS FQKKTL RKG NVI ITGASSGLGIATAKAIGETGFWHVIMACRDFLKAERAAKS   |
| <i>Cucumis</i>              | -----TFSPA VNKATPDGKKTL RKG SVVITGASSGLGIATAKALAETGKWHVIMACRDFLKAERAAKS    |
| <i>Pisum</i>                | -----PATPAVNKSSS FGGKTL RKG NVVITGASSGLGIATAKALAESGKWHVIMACRDFLKAERAAKS    |
| <i>Pinus</i>                | -----VAAPVETKDA PASKKTL RKG NVI ITGASSGLGIATAKALGESGKWHVIMACRDFLKAERAAKS   |
| <i>Marchantia</i>           | -----VTAPAETMKNPSSSKKTATKSTCIITGASSGLGIATAKALADTGEWHVIMACRDFLKAERAAKS      |
| <i>Vigna</i>                | -----ATTPGVTKASPEGKTL RKG SVIITGASSGLGIATAKALAETGKWHVIMACRDFLKAERAAKS      |
| <i>Daucus</i>               | -----ATTPSVNRATGEGKTL RKG SVIITGASSGLGIATAKALAETGKWHVIMACRDFLKAERAAKS      |
| <i>Arabidopsis-thaliana</i> | -----TSTPSVTKSS LDRKKT L RKG NVVITGASSGLGIATAKALAETGKWHVIMACRDFLKAERAAKS   |
| <i>Hordeum</i>              | -----VSAPTAI PAS PASKKTL RKG NVI ITGASSGLGIATAKALAESGKWHVIMACRDFLKAERAAKS  |
| <i>Zea</i>                  | -----YSSPSVTPAS PGGKTL RKG TAVITGASSGLGIATAKALAETGKWHVIMACRDFLKAERAAKS     |
| <i>Triticum</i>             | -----TTSPGSATAKPSGKTL RQG VVITGASSGLGLAAAKALAETGKWHVIMACRDFLKAERAAKS       |
| <i>Avena</i>                | -----VVVITGASSGLGLAAAKALAETGKWHVIMACRDFLKAERAAKS                           |
| <i>Gloeobacter</i>          | -----MAEQITVITGASSGLHAADS LAQSGRWIYMACRDFLKAERAAKS                         |
| <i>Acaryochloris</i>        | -----MEQHKKQIVVVTGASSGLYAAKALALTGKWHVIMACRDFLKAERAAKS                      |
| <i>Trichodesmium</i>        | -----MKNHKSIVVITGASSGLHAAKALAKTGEWYVIMACRDFLKAERAAKS                       |
| <i>Microcystis</i>          | -----MIQDKKPIVITGTTSGVLYAAKSLAQRG-WFVIMACRDFLKAERAAKS                      |
| <i>Nostoc</i>               | -----MVQDRKSTVITGASSGLYAAKALAEERG-WYVIMACRDFLKAERAAKS                      |
| <i>Crocospaera</i>          | -----MVENRQSTVITGASSGLYAAKALADRG-WYVIMACRDFLKAERAAKS                       |
| <i>Synechocystis</i>        | -----MEQPMKPTVITGASSGLYGAKALIDKG-WHYIMACRDFLKAERAAKS                       |
| <i>Thermo</i>               | -----MSDQPRPTVITGASSGLYATKALANRG-WHYIMACRDFLKAERAAKS                       |
| <i>Plectonema</i>           | -----MAQDQKPTVITGASSGLYAAKALVKRG-WHYIMACRDFLKAERAAKS                       |
| <i>Synechococcus</i>        | -----MSTPGTVITGTTSGVGNATCALVKRG-WTYIMACRDFLKAERAAKS                        |
| <i>Cyanothece</i>           | -----MGVSIHMVENHKSIVITGASSGLYAAKALADRG-WYVIMACRDFLKAERAAKS                 |
| <i>Anabaena</i>             | -----MAQDRKSTVITGASSGLYAAKALAKRG-WHYIMACRDFLKAERAAKS                       |
| <i>Prochlorococcus</i>      | -----MSSFQSPGTVITGTTSGVLYATKALIDLG-WKVIITANRSPERAQAAKS                     |
| <i>Nicotiana</i>            | VGIP---KE-NYTVMHLDIASLFSVRQFVDT-FR RSGRPLDALVCNAAVYLP TAKEPTFTADGFELSVG    |
| <i>Cucumis</i>              | AGIT---KE-NYTVMHLDIASLFSVRQFVDN-FR QSGRPLDVLVCNAAVYLP TAKEPTFTADGFELSVG    |
| <i>Pisum</i>                | AGLA---KE-NYTVMHLDIASLFSVRQFVDN-FR RSEMPLDVLINAAVYFP TAKEPTFTADGFELSVG     |
| <i>Pinus</i>                | VGIP---KE-NYSVMHLDIASLFSVRQFADN-FR RSGRPLDVLVCNAAVYLP TAKEPTFTADGFELSVG    |
| <i>Marchantia</i>           | VGIP---KD-SYTVIHCDLASFQSVRAQVDN-FR RTERQLDVLVCNAAVYFP DKEPKFSAEGFELSVG     |
| <i>Vigna</i>                | SGIS---KE-NYTVMHLDIASLFSVRQFVDN-FR QSGRPLDVLVCNAAVYLP TAKEPTFTADGFELSVG    |
| <i>Daucus</i>               | AGMP---KE-NYTVMHLDIASLFSVRQFVET-FR RSEMPLDVLVCNAAVYFP TAKEPTFTADGFELSVG    |
| <i>Arabidopsis-thaliana</i> | AGMP---KD-SYTVMHLDIASLFSVRQFVDN-FR RAEMPLDVLVCNAAVYFP ANQPTFTADGFELSVG     |
| <i>Hordeum</i>              | AGMP---KG-SYTVIHLDIASLFSVRQFVKN-VR QLDMPIDVYVCNAAVYFP TAKEPTFTADGFELSVG    |
| <i>Zea</i>                  | AGMD---KD-SFTVYHLDIASLFSVRQFVYRN-VR QLNKPIDVYVCNAAVYFP TAKEPTFTADGFELSVG   |
| <i>Triticum</i>             | AGMA---DG-SYTVMHLDIASLFSVRQFVDA-FR RAEMPLDVLVCNAAVYFP TARTPTFTADGFELSVG    |
| <i>Avena</i>                | AGMA---DG-SYTVMHLDIASLFSVRQFVDA-FR RAEMPLDVLVCNAAVYFP TARKPTFTADGFELSVG    |
| <i>Gloeobacter</i>          | LGMR---PQ-SYTVIHLDIASLFSVRQFVQD-FR ALGQPLDALVCNAAVYFP TAREPTFTADGFELSVG    |
| <i>Acaryochloris</i>        | VGIP---RD-SYTVIHLDLACFESIHFRVYKD-FREMGRSIDALVCNAAVYFP LKLPKHLTAEGVELNMG    |
| <i>Trichodesmium</i>        | VGMT---QD-SYVMHLDLASELVKRFVYK-FRESGRSLEALVCNAAVYLP LKLPKPMRSIDGVEISVA      |
| <i>Microcystis</i>          | LNIP---RD-NYCI EFDLGS LDSVRQFVKN-FRALGRSLTALVCNAAVYFP LKLPKPELRSPEGVELSMA  |
| <i>Nostoc</i>               | VGIP---HQGSYTIMHIDLGS LDSVRQFVKN-FRASGHS LDALVCNAAVYFP LKLPKPELRSPEGVELTMT |
| <i>Crocospaera</i>          | LGIA---LD-AYTVMHIDLGNLDSVRQFVQD-FRATGKTLDALVCNAAVYFP LKLPKPELRSPEGVELSMT   |
| <i>Synechocystis</i>        | LGFP---KD-SYTIKLDLGYLDSVRQFVQD-FRELGRPKALVCNAAVYFP LKLPKPELRSPEGVELSVA     |
| <i>Thermo</i>               | LQIP---PE-AYTILHLDLSSLASVRQFVES-FRALNRPRLALVCNAAVYFP LKLPKPELRSPEGVELTVA   |
| <i>Plectonema</i>           | LGMS---PD-SYTLMHIDLGS LDSVRQFVYQ-FRESGRSLEALVCNAAVYFP LKLPKPMRSIDGVEISVA   |
| <i>Synechococcus</i>        | MDLP---KE-RLQHVLMDLGDLDSVRQFVND---ALPDRLDAYVCNAAVYFP LKLPKPELRSPEGVELSMA   |
| <i>Cyanothece</i>           | VGIP---LD-SYTVMHIDLGS LDSVRQFVYK-FRATGKSLDALVCNAAVYFP LKLPKPELRSPEGVELSMT  |
| <i>Anabaena</i>             | VGIP---KD-SYSI HIDLGS LDSVRQFVND-FRATGKSLDALVCNAAVYFP LKLPKPELRSPEGVELTMT  |
| <i>Prochlorococcus</i>      | LGLPFRCPK-LQHQHSIDLSDLDSVSKGYKDLDLKDFELDALVCNAAVYFP LKLPKPELRSPEGVELSMA    |
| <i>Nicotiana</i>            | TNHLGHFLLSRLLEDLQKSDYP-----QKRLIVGSI TGNNTLAGN--VPPKANLGDRLGLS             |
| <i>Cucumis</i>              | TNHLGHFLLSRLLEDLQKSDYP-----SKRLIVGSI TGNNTLAGN--VPPKANLGDRLGLA             |
| <i>Pisum</i>                | TNHLGHFLLSRLLEDLQKSDYP-----SKRLIVGSI TGNNTLAGN--VPPKANLGDRLGLA             |
| <i>Pinus</i>                | TNHLGHFLLSRLLEDLQKSDYP-----SKRVIIVGSI TGNNTLAGN--VPPKANLGDRLGLA            |
| <i>Marchantia</i>           | TNHLGHFLLSRLLEDLQKSDYP-----LKRMIIVGSI TGNNTLAGN--VPPKANLGDRLGLA            |
| <i>Vigna</i>                | TNHLGHFLLSRLLEDLQKSDYP-----SKRLIVGSI TGNNTLAGN--VPPKANLGDRLGLA             |
| <i>Daucus</i>               | TNHLGHFLLSRLLEDLQKSDYP-----SKRLIVGSI TGNNTLAGN--VPPKANLGDRLGLA             |
| <i>Arabidopsis-thaliana</i> | TNHLGHFLLSRLLEDLQKSDYP-----SKRLIVGSI TGNNTLAGN--VPPKANLGDRLGLA             |
| <i>Hordeum</i>              | TNHLGHFLLSRLLEDLQKSDYP-----SKRLIVGSI TGNNTLAGN--VPPKANLGDRLGLA             |
| <i>Zea</i>                  | TNHLGHFLLSRLLEDLQKSDYP-----SKRLIVGSI TGNNTLAGN--VPPKANLGDRLGLA             |
| <i>Triticum</i>             | TNHLGHFLLSRLLEDLQKSDYP-----SKRLIVGSI TGNNTLAGN--VPPKANLGDRLGLA             |
| <i>Avena</i>                | TNHLGHFLLSRLLEDLQKSDYP-----SKRLIVGSI TGNNTLAGN--VPPKANLGDRLGLA             |
| <i>Gloeobacter</i>          | TNHLGHFLLSRLLEDLQKSDYP-----SKRLIVGSI TGNNTLAGN--VPPKANLGDRLGLA             |
| <i>Acaryochloris</i>        | TNHLGHFLLSRLLEDLQKSDYP-----SKRLIVGSI TGNNTLAGN--VPPKANLGDRLGLA             |
| <i>Trichodesmium</i>        | TNHLGHFLLSRLLEDLQKSDYP-----SKRLIVGSI TGNNTLAGN--VPPKANLGDRLGLA             |
| <i>Microcystis</i>          | TNHLGHFLLSRLLEDLQKSDYP-----SKRLIVGSI TGNNTLAGN--VPPKANLGDRLGLA             |
| <i>Nostoc</i>               | TNHLGHFLLSRLLEDLQKSDYP-----SKRLIVGSI TGNNTLAGN--VPPKANLGDRLGLA             |
| <i>Crocospaera</i>          | TNHLGHFLLSRLLEDLQKSDYP-----SKRLIVGSI TGNNTLAGN--VPPKANLGDRLGLA             |
| <i>Synechocystis</i>        | TNHLGHFLLSRLLEDLQKSDYP-----SKRLIVGSI TGNNTLAGN--VPPKANLGDRLGLA             |
| <i>Thermo</i>               | TNHLGHFLLSRLLEDLQKSDYP-----SKRLIVGSI TGNNTLAGN--VPPKANLGDRLGLA             |
| <i>Plectonema</i>           | TNHLGHFLLSRLLEDLQKSDYP-----SKRLIVGSI TGNNTLAGN--VPPKANLGDRLGLA             |
| <i>Synechococcus</i>        | TNHLGHFLLSRLLEDLQKSDYP-----SKRLIVGSI TGNNTLAGN--VPPKANLGDRLGLA             |
| <i>Cyanothece</i>           | TNHLGHFLLSRLLEDLQKSDYP-----SKRLIVGSI TGNNTLAGN--VPPKANLGDRLGLA             |
| <i>Anabaena</i>             | TNHLGHFLLSRLLEDLQKSDYP-----SKRLIVGSI TGNNTLAGN--VPPKANLGDRLGLA             |
| <i>Prochlorococcus</i>      | TNHLGHFLLSRLLEDLQKSDYP-----SKRLIVGSI TGNNTLAGN--VPPKANLGDRLGLA             |

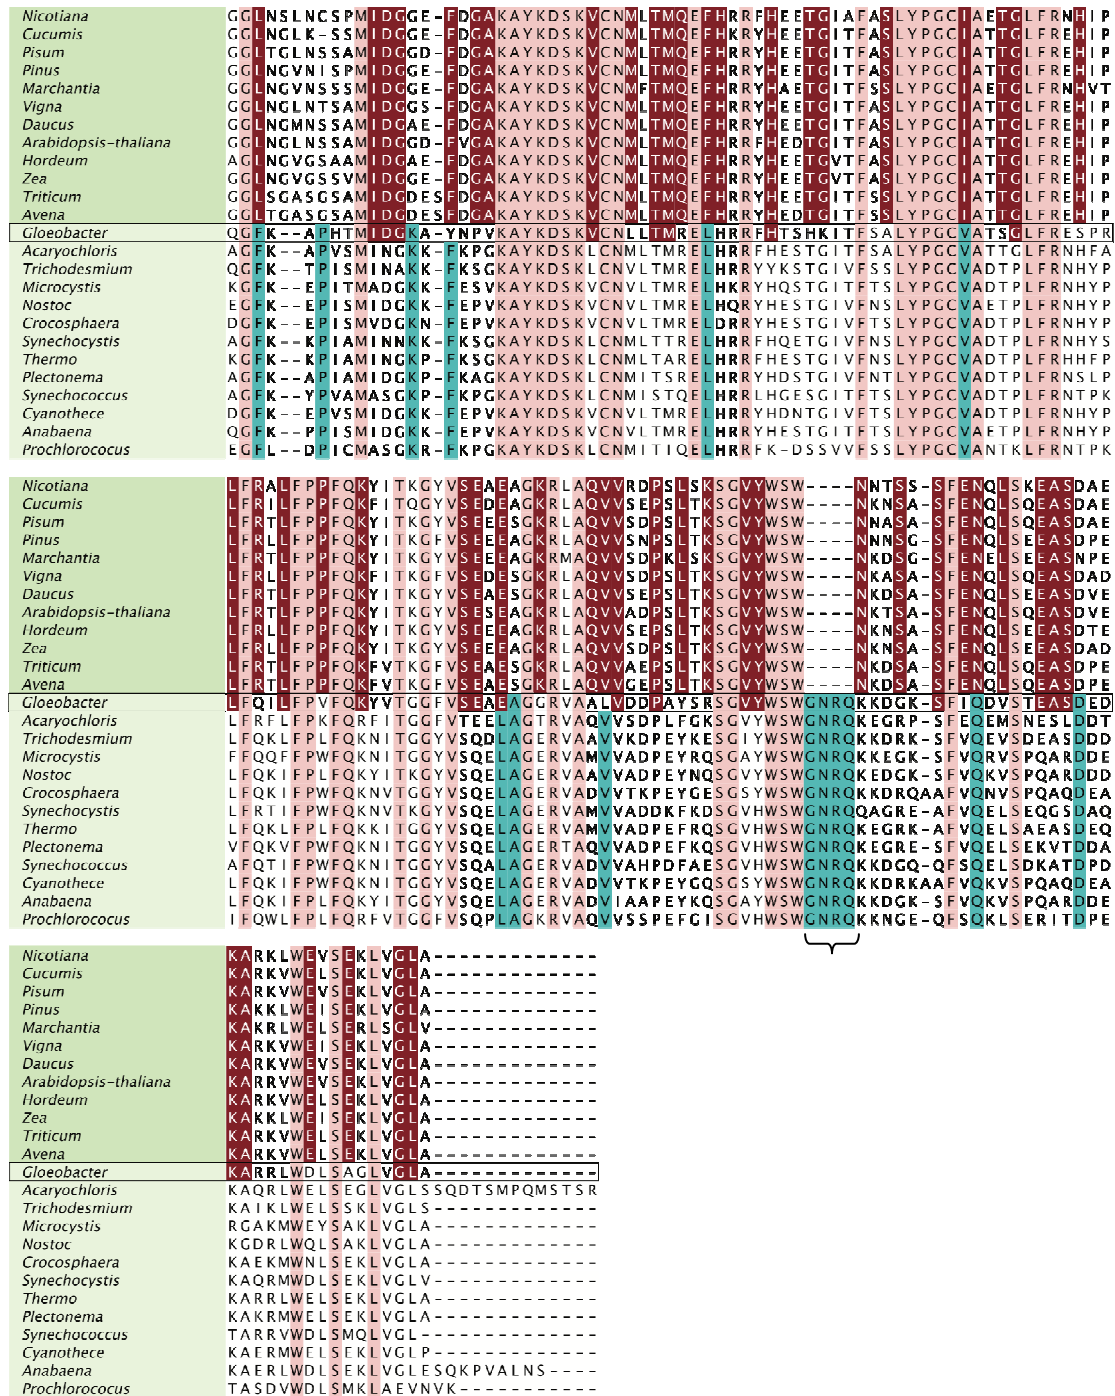

**Figure S2.** Sequence alignment highlighting total conservation (pink) and differential conservation in the cyanobacterial (green) and plant PORs (red). *Gloeobacter violaceus* (black box) shows a mixture of conservation of features relating to both groups of POR. Species ‘Thermo’ represents the sequence from *Thermosynechococcus elongatus*. The bracket indicates the additional 4 residues at position 281 (numbering in *T. elongatus* POR) in the cyanobacteria PORs referred to in the main manuscript.

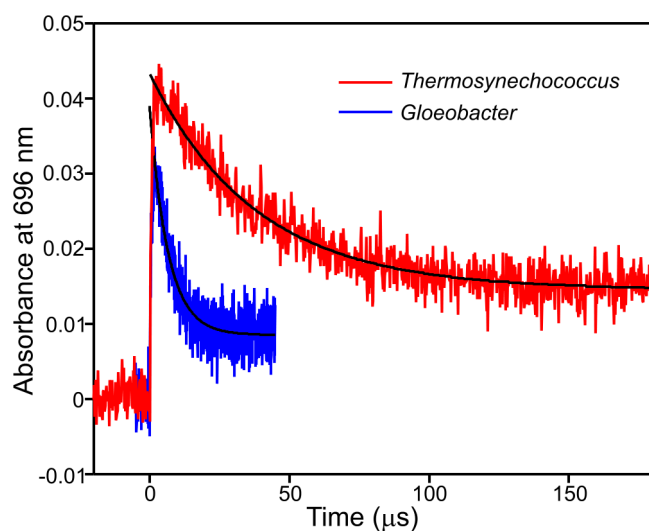

**Figure S3.** Kinetic transients showing the absorbance changes at 696 nm for POR from *Thermosynechococcus elongatus* and *Gloeobacter violaceus* following laser photoexcitation at 450 nm. The initial increase in absorbance represents hydride transfer (1) and the slower decrease in absorbance represents the proton transfer step (1). Transients were collected at 25°C as described in the *Materials and Methods*.

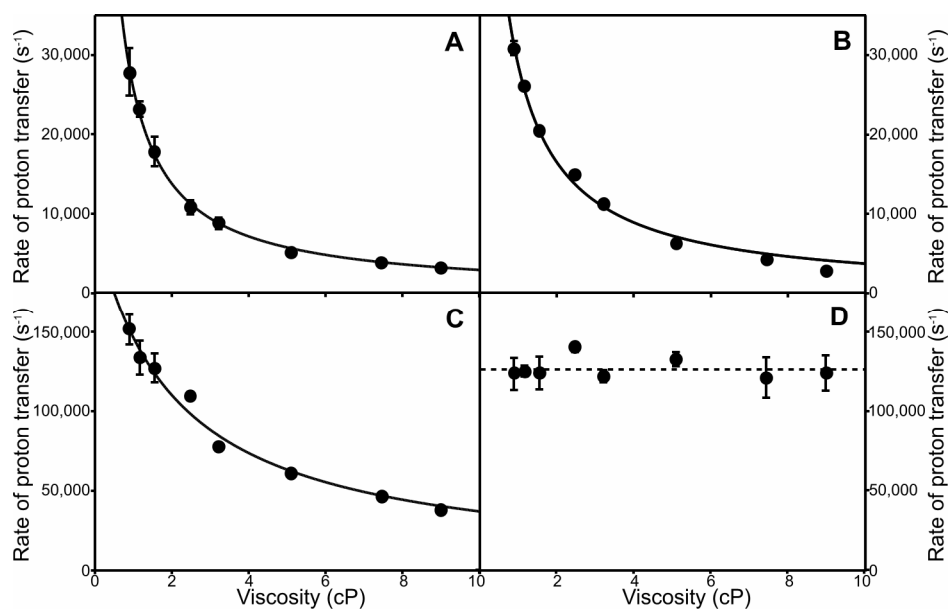

**Figure S4.** The viscosity-dependence of the proton transfer reaction. The viscosity dependence of the rate constant for the decrease in absorbance at 696 nm, representing proton transfer, is shown for POR from *Thermosynechococcus elongatus* (A), *Synechocystis* sp. PCC6803 (B), *Gloeobacter violaceus* (C) and *Arabidopsis thaliana* POR B (D). All measurements were recorded over a range of timescales as described in the *Methods*. The error bars were calculated from the average of at least 3 traces.



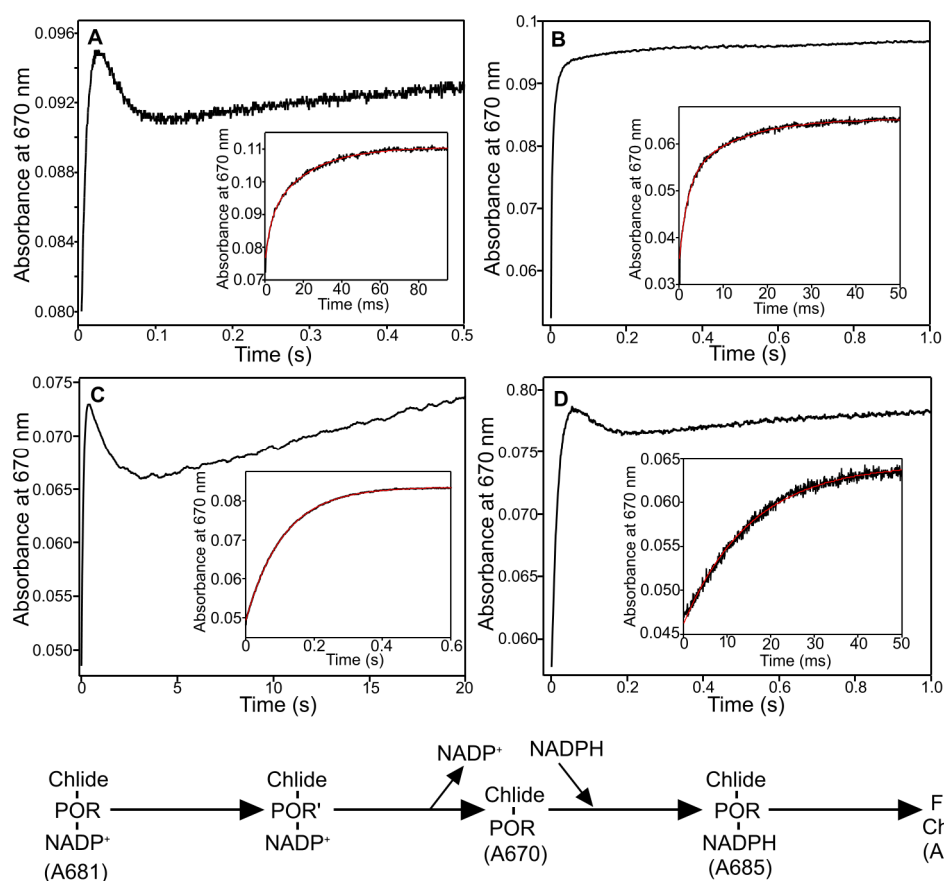

**Figure S5.** Kinetic transients showing product release steps following laser photoexcitation at 450 nm. Transients, showing all three spectroscopic changes associated with the product release and NADPH re-binding events, were measured at 670 nm for POR from *Thermosynechococcus elongatus* (**A**), *Synechocystis* sp. PCC6803 (**B**), *Gloeobacter violaceus* (**C**) and *Arabidopsis thaliana* POR B (**D**) (2). All measurements were recorded over a range of timescales at 25°C as described in the *Methods*. A scheme of the product release steps is shown at the bottom to indicate the spectral change associated with each phase (2). The rates of each product release step are shown in Table S3. Panel A is taken from (2).

## Supplementary References

1. Heyes, D. J., Sakuma, M., De Visser, S. & Scrutton, N. S. (2009) Nuclear quantum tunneling in the light-activated enzyme protochlorophyllide oxidoreductase. *J. Biol. Chem.* **284**: 3762-3767.
2. Heyes, D. J., Sakuma, M. & Scrutton, N. S. (2007) Laser excitation studies of the product release steps in the catalytic cycle of the light-driven enzyme, protochlorophyllide oxidoreductase. *J. Biol. Chem.* **282**: 32015–32020.
